# Supplementary material
Source: Springer Nature journal article supplement (https://www.springermedizin.de/resource/supplementary/12967_2008_290_MOESM4_ESM.pdf/9576126)
Supplement: MOESM4 [file 9576126]

**DAY 0**

**PLATING OF PATIENT PBMC  
IN 96 MICROWELL FORMAT**

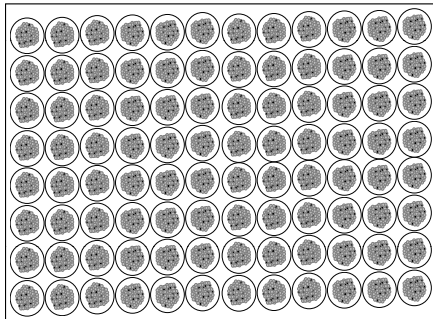

**In vitro  
sensitization  
with peptide/IL-2  
for 10 days**

**DAY 10**

**HIGH THROUGHPUT FUNCTIONAL  
SCREENING OF MICROWELLS  
BY INTERFERON- $\gamma$  PCR ASSAY**

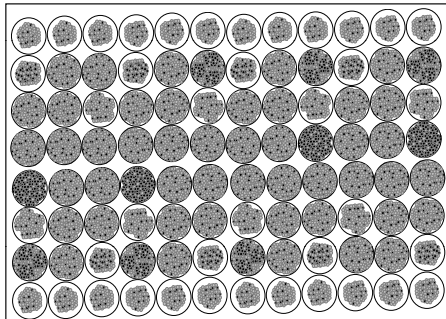

**Selection of  
highest reactive  
microwell for limiting  
dilution cloning**

**DAY 24**

**SCREENING OF CLONES  
FOR FUNCTION AND  
PHENOTYPE**

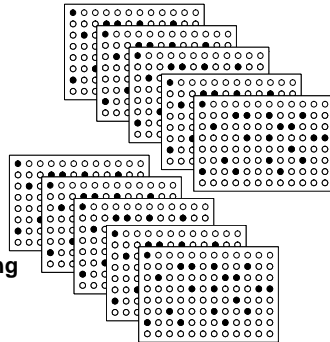

**Expansion of  
selected clones for  
adoptive transfer**
